# Supplementary material
Source: publisher figshare collection journal article supplement (https://sage.figshare.com/ndownloader/files/13158530)
Supplement: Supplementary file 1 [file 13158530]

MEDICAL RECORD ABSTRACTION INSTRUMENT  
ICU Patient Safety Outcome Measures  
Upper Gastrointestinal Bleed

**ICU Patient Safety Outcome Measures Data Abstraction Tool  
Upper Gastrointestinal Bleed**

**PATIENT SECURITY TEAR SHEET**

**Instructions:**

1. Complete tear sheet.
2. Add full ID number to top of each page of abstraction instrument

This ID number will begin with the institution code, followed by the study ID number.

3. Complete abstraction and file in according to security protocols
4. Remove tear sheet after data entry
5. File completed Abstraction Instrument and Tear Sheet in separate locked cabinets

| Patient name |    |      |
|--------------|----|------|
| FIRST        | MI | LAST |
|              |    |      |

| Patient Study Number |
|----------------------|
|                      |

| Data Abstractor's Number |
|--------------------------|
|                          |

MEDICAL RECORD ABSTRACTION INSTRUMENT  
ICU Patient Safety Outcome Measures  
Upper Gastrointestinal Bleed

| DEMOGRAPHICS |                                                                                                          |                                                                                                                                                                                                                                                                                                                                                                                                                                                                                                                                           |
|--------------|----------------------------------------------------------------------------------------------------------|-------------------------------------------------------------------------------------------------------------------------------------------------------------------------------------------------------------------------------------------------------------------------------------------------------------------------------------------------------------------------------------------------------------------------------------------------------------------------------------------------------------------------------------------|
| #            | QUESTION                                                                                                 | RESPONSE                                                                                                                                                                                                                                                                                                                                                                                                                                                                                                                                  |
| 1            | Gender                                                                                                   | <input type="checkbox"/> Male<br><input type="checkbox"/> Female                                                                                                                                                                                                                                                                                                                                                                                                                                                                          |
| 2            | Date of Birth                                                                                            | __ / __ / ____                                                                                                                                                                                                                                                                                                                                                                                                                                                                                                                            |
| 3            | <b>Race</b><br><br>Note: The numbers in the parentheses correspond to how MGH codes race upon admission. | <input type="checkbox"/> Asian (1)<br><input type="checkbox"/> Black or African American (2)<br><input type="checkbox"/> Declined (3)<br><input type="checkbox"/> Hispanic / Latino (4)<br><input type="checkbox"/> American Indian / Alaska Native (5)<br><input type="checkbox"/> Other (6) <i>Write in:</i> _____<br><input type="checkbox"/> Native Hawaiian or Pacific Islander (7)<br><input type="checkbox"/> Unavailable / Unknown (8)<br><input type="checkbox"/> White or Caucasian (9)<br><input type="checkbox"/> Multiracial |
| 4            | Hospital Admission                                                                                       | <b>Date:</b> __ / __ / ____<br><b>Time:</b> __ : __                                                                                                                                                                                                                                                                                                                                                                                                                                                                                       |
| 5            | Hospital Discharge                                                                                       | <b>Date:</b> __ / __ / ____<br><b>Time:</b> __ : __                                                                                                                                                                                                                                                                                                                                                                                                                                                                                       |
| 6            | ICU Admission                                                                                            | <b>Date:</b> __ / __ / ____<br><b>Time:</b> __ : __                                                                                                                                                                                                                                                                                                                                                                                                                                                                                       |
| 7            | ICU Discharge                                                                                            | <b>Date:</b> __ / __ / ____<br><b>Time:</b> __ : __                                                                                                                                                                                                                                                                                                                                                                                                                                                                                       |
| 8            | Please indicate the type of ICU to which the patient was                                                 | <input type="checkbox"/> Burn Critical Care<br><input type="checkbox"/> Medical Cardiac Critical Care                                                                                                                                                                                                                                                                                                                                                                                                                                     |

MEDICAL RECORD ABSTRACTION INSTRUMENT  
ICU Patient Safety Outcome Measures  
Upper Gastrointestinal Bleed

|    |                                                                  |                                                                                                                                                                                                                                                                                                                                                                                                                                                                                                                                                                                                                                                                                                                                                                                                                                                                                                                                                                                                                                                                                         |  |
|----|------------------------------------------------------------------|-----------------------------------------------------------------------------------------------------------------------------------------------------------------------------------------------------------------------------------------------------------------------------------------------------------------------------------------------------------------------------------------------------------------------------------------------------------------------------------------------------------------------------------------------------------------------------------------------------------------------------------------------------------------------------------------------------------------------------------------------------------------------------------------------------------------------------------------------------------------------------------------------------------------------------------------------------------------------------------------------------------------------------------------------------------------------------------------|--|
|    | admitted.                                                        | <input type="checkbox"/> Medical Critical Care<br><input type="checkbox"/> Medical/Surgical Critical Care<br><input type="checkbox"/> Neurologic Critical Care<br><input type="checkbox"/> Neurosurgical Critical Care<br><input type="checkbox"/> ONC Medical Critical Care<br><input type="checkbox"/> ONC Surgical Critical Care<br><input type="checkbox"/> ONC Medical-Surgical Critical Care<br><input type="checkbox"/> Prenatal Critical Care<br><input type="checkbox"/> Respiratory Critical Care<br><input type="checkbox"/> Surgical Cardiothoracic Critical Care<br><input type="checkbox"/> Surgical Critical Care<br><input type="checkbox"/> Trauma Critical Care<br><input type="checkbox"/> Inpatient Dialysis Specialty Care Area (SCA)<br><input type="checkbox"/> Solid Organ Transplant SCA<br><input type="checkbox"/> Adult Mixed Acuity Unit<br><input type="checkbox"/> Mixed Age Mixed Acuity Unit<br><input type="checkbox"/> ONC Mixed Acuity Unit (all ages)<br><input type="checkbox"/> Other: <i>Write in</i> _____<br><input type="checkbox"/> Unknown |  |
| 9  | Height                                                           | Height<br>Value: _____ Unit: _____<br>(cm or inches, please specify which unit)<br><br><input type="checkbox"/> Height not recorded                                                                                                                                                                                                                                                                                                                                                                                                                                                                                                                                                                                                                                                                                                                                                                                                                                                                                                                                                     |  |
| 10 | Weight on admission to the ICU, if recorded.                     | Weight<br>Value: _____ Unit: _____<br>(kg or pounds, please specify which unit)<br><br><input type="checkbox"/> Weight not recorded                                                                                                                                                                                                                                                                                                                                                                                                                                                                                                                                                                                                                                                                                                                                                                                                                                                                                                                                                     |  |
| 11 | What was the status of the patient at the time of ICU discharge? | <input type="checkbox"/> Stable<br><input type="checkbox"/> Discharged for comfort care with no expectation of recovery<br><input type="checkbox"/> Dead<br><input type="checkbox"/> Heart still beating but under consideration for organ donation                                                                                                                                                                                                                                                                                                                                                                                                                                                                                                                                                                                                                                                                                                                                                                                                                                     |  |
| 12 | Please indicate the patient's care site prior                    | <input type="checkbox"/> a. Your acute-care hospital                                                                                                                                                                                                                                                                                                                                                                                                                                                                                                                                                                                                                                                                                                                                                                                                                                                                                                                                                                                                                                    |  |

MEDICAL RECORD ABSTRACTION INSTRUMENT  
ICU Patient Safety Outcome Measures  
Upper Gastrointestinal Bleed

|           |                                                                                                                                            |                                                                                                                                                                                                                                                                                                                                                                                                                                                |  |
|-----------|--------------------------------------------------------------------------------------------------------------------------------------------|------------------------------------------------------------------------------------------------------------------------------------------------------------------------------------------------------------------------------------------------------------------------------------------------------------------------------------------------------------------------------------------------------------------------------------------------|--|
|           | <p><b>to this ICU admission.</b></p> <p>Please choose one response.</p>                                                                    | <input type="checkbox"/> <b>b. Another acute care hospital</b><br><input type="checkbox"/> <b>c. Skilled Nursing Facility (SNF) / Intermediate Care</b><br><input type="checkbox"/> <b>d. Rehabilitation Unit</b><br><input type="checkbox"/> <b>e. Home</b><br><input type="checkbox"/> <b>g. Other</b> _____                                                                                                                                 |  |
| <b>13</b> | <p><b>If the response choice to Question 12 was "a," indicate the patient's department/unit care site prior to this ICU admission.</b></p> | <input type="checkbox"/> <b>a. Ward or floor unit</b><br><input type="checkbox"/> <b>b. Emergency department</b><br><input type="checkbox"/> <b>c. Cardiac Catheterization Lab</b><br><input type="checkbox"/> <b>d. Step Down / Transitional Care Unit</b><br><input type="checkbox"/> <b>e. Operating Room or Surgical Recovery Room</b><br><input type="checkbox"/> <b>f. Other ICU</b> _____<br><input type="checkbox"/> <b>g. Unknown</b> |  |

MEDICAL RECORD ABSTRACTION INSTRUMENT  
ICU Patient Safety Outcome Measures  
Upper Gastrointestinal Bleed

**RISK ADJUSTER – SEQUENTIAL ORGAN FAILURE ASSESSMENT (SOFA) SCORE**

| #                                                                                                       | QUESTION                                                                                                                                       | RESPONSE                                                                                                                                                                                          |
|---------------------------------------------------------------------------------------------------------|------------------------------------------------------------------------------------------------------------------------------------------------|---------------------------------------------------------------------------------------------------------------------------------------------------------------------------------------------------|
| <b>Use the worst values in first 24 hours of ICU admission or closest to the time of ICU admission.</b> |                                                                                                                                                |                                                                                                                                                                                                   |
| 14                                                                                                      | What was the patient's lowest arterial partial pressure of oxygen (PaO <sub>2</sub> ) within 24 hours of ICU admission?                        | Lowest PaO <sub>2</sub> : _____<br><br>Unit of Measurement:<br><input type="checkbox"/> mmHG<br><input type="checkbox"/> kPa<br><input type="checkbox"/> Other: _____                             |
| 15                                                                                                      | How much was the fraction of inspired oxygen (FiO <sub>2</sub> ) was the patient on at the measurement of the PaO <sub>2</sub> in Question 14? | FiO <sub>2</sub> : _____ %                                                                                                                                                                        |
| 16                                                                                                      | What was the patient's lowest platelet count within 24 hours of ICU admission?                                                                 | Lowest Platelet Count: _____<br><br>Unit of Measurement:<br><input type="checkbox"/> x10 <sup>3</sup> /uL<br><input type="checkbox"/> 10 <sup>9</sup> /L<br><input type="checkbox"/> Other: _____ |
| 17                                                                                                      | What was the patients worst Glasgow Coma Scale measurement within 24 hours of ICU admission?                                                   | Glasgow Coma Scale: _____                                                                                                                                                                         |
| 18                                                                                                      | What was the patient's highest bilirubin level within 24 hours of ICU admission?                                                               | Highest Bilirubin Level: _____<br><br>Unit of Measurement:<br><input type="checkbox"/> mg/dL<br><input type="checkbox"/> umol/L<br><input type="checkbox"/> Other: _____                          |
| 19                                                                                                      | What was the patient's highest                                                                                                                 | Highest Creatinine Level: _____                                                                                                                                                                   |

MEDICAL RECORD ABSTRACTION INSTRUMENT  
ICU Patient Safety Outcome Measures  
Upper Gastrointestinal Bleed

|    |                                                                                                                                                                                                                                                                                                                                                                    |                                                                                                                                                                                                               |
|----|--------------------------------------------------------------------------------------------------------------------------------------------------------------------------------------------------------------------------------------------------------------------------------------------------------------------------------------------------------------------|---------------------------------------------------------------------------------------------------------------------------------------------------------------------------------------------------------------|
|    | <b>creatinine level within 24 hours of ICU admission?</b>                                                                                                                                                                                                                                                                                                          | <b>Unit of Measurement:</b><br><input type="checkbox"/> mg/dL<br><input type="checkbox"/> umol/L<br><input type="checkbox"/> Other: _____                                                                     |
| 20 | <b>Does the patient have any documented use of vasopressors during the first 24 hours of the ICU stay? Please list all drugs.</b><br><br>1. Dopamine<br>2. Epinephrine<br>3. Norepinephrine<br>4. Phenylephrine<br>5. Vasopressin<br><br>Exclude: Dobutamine and Milrinone.<br><br><b>If yes, document all vasopressors, maximum dosages, start and end dates.</b> | <input type="checkbox"/> YES<br><input type="checkbox"/> NO<br><br><b>Drug #1:</b> _____<br><br><b>Maximum Dose in First 24 hours:</b> _____<br><br><b>Start Date:</b> __ / __ / ____<br><b>Time:</b> __ : __ |
|    |                                                                                                                                                                                                                                                                                                                                                                    | <b>Drug #2:</b> _____<br><br><b>Maximum Dose in First 24 hours:</b> _____<br><br><b>Start Date:</b> __ / __ / ____<br><b>Time:</b> __ : __                                                                    |
|    |                                                                                                                                                                                                                                                                                                                                                                    | <b>Drug #3:</b> _____<br><br><b>Maximum Dose in First 24 hours:</b> _____<br><br><b>Start Date:</b> __ / __ / ____<br><b>Time:</b> __ : __                                                                    |
| 21 | <b>SOFA Score</b>                                                                                                                                                                                                                                                                                                                                                  | <b>Calculate</b>                                                                                                                                                                                              |

MEDICAL RECORD ABSTRACTION INSTRUMENT  
ICU Patient Safety Outcome Measures  
Upper Gastrointestinal Bleed

**UPPER GASTROINTESTINAL BLEED**

| #                                                                                                                                                                                                                                                                           | QUESTION                                                                                                                                                                                                                                                                    | RESPONSE                                                                                                                                                                    |
|-----------------------------------------------------------------------------------------------------------------------------------------------------------------------------------------------------------------------------------------------------------------------------|-----------------------------------------------------------------------------------------------------------------------------------------------------------------------------------------------------------------------------------------------------------------------------|-----------------------------------------------------------------------------------------------------------------------------------------------------------------------------|
| <b>DEFINITION</b><br>Any patient in the ICU who had documented evidence of a GI bleed as defined by: 1) New heme positive stool, melena or hematemesis AND either received a transfusion of packed red blood cells (PRBCs) OR 2) Had a colonoscopy or esophagogastrosocopy. |                                                                                                                                                                                                                                                                             |                                                                                                                                                                             |
| 22                                                                                                                                                                                                                                                                          | <b>At the time of ICU admission, did the patient have gastrointestinal bleeding?</b><br><br>(Include only clinically apparent GI bleeding. Examples include hematemesis, coffee ground emesis, or melena; a drop in hematocrit or perforated ulcer alone is NOT sufficient) | <input type="checkbox"/> Upper GI Bleed<br><input type="checkbox"/> Lower GI Bleed<br><input type="checkbox"/> GI Bleed, unknown source<br><input type="checkbox"/> Unknown |
| 23                                                                                                                                                                                                                                                                          | <b>Did the patient have a new heme positive stool documented during this ICU stay? If so, please record the first date.</b>                                                                                                                                                 | <input type="checkbox"/> YES<br><input type="checkbox"/> NO<br><br>If YES:<br>First Date __ / __ / ____                                                                     |
| 24                                                                                                                                                                                                                                                                          | <b>Did the patient have new melena documented during this ICU stay?</b><br><br><b>If so, please record the first date.</b><br><br>Note: Refer to daily ICU notes.                                                                                                           | <input type="checkbox"/> YES<br><input type="checkbox"/> NO<br><br>If YES:<br>First Date __ / __ / ____                                                                     |
| 25                                                                                                                                                                                                                                                                          | <b>Did the patient have new hematemesis documented during this ICU stay?</b><br><br><b>If so, please record the date.</b><br><br>Note: Refer to daily ICU notes.                                                                                                            | <input type="checkbox"/> YES<br><input type="checkbox"/> NO<br><br>If YES:<br>First Date __ / __ / ____                                                                     |
|                                                                                                                                                                                                                                                                             | <b>Did the patient receive a transfusion of packed red blood cells at any time during this ICU</b>                                                                                                                                                                          | <input type="checkbox"/> YES<br><input type="checkbox"/> NO                                                                                                                 |

MEDICAL RECORD ABSTRACTION INSTRUMENT  
ICU Patient Safety Outcome Measures  
Upper Gastrointestinal Bleed

|                                                                                                                                                          |                                                                                                                                                                                                                                                                                           |                                                                                                                                                                                                                                                               |
|----------------------------------------------------------------------------------------------------------------------------------------------------------|-------------------------------------------------------------------------------------------------------------------------------------------------------------------------------------------------------------------------------------------------------------------------------------------|---------------------------------------------------------------------------------------------------------------------------------------------------------------------------------------------------------------------------------------------------------------|
| <b>26</b>                                                                                                                                                | <p><b>stay?</b></p> <p><b>If so, please record the dates where patient received &gt; or equal to 2 PRBCs in one day.</b></p>                                                                                                                                                              | <p><b>If YES:</b></p> <p>Date __/__/____</p> <p>Date __/__/____</p> <p>Date __/__/____</p> <p>Date __/__/____</p>                                                                                                                                             |
| <b>27</b>                                                                                                                                                | <p><b>Did the patient have a colonoscopy performed during this ICU stay? Please record the date of the procedure.</b></p> <p><b>If so, what was the reason for the colonoscopy?</b></p> <p>Note: Reasons may be found in any of the following: chart/daily notes and/or consent form.</p> | <p><input type="checkbox"/> YES</p> <p><input type="checkbox"/> NO</p> <p><b>If YES: Date __/__/____</b></p> <p><b>If yes, what was the reason documented?</b></p>                                                                                            |
| <b>28</b>                                                                                                                                                | <p><b>Did the patient have an esophagogastrosocopy during this ICU stay? Please record the date.</b></p> <p><b>If so, what was the reason for the esophagogastrosocopy?</b></p> <p>Note: Reasons may be found in any of the following: chart/daily notes and/or consent form.</p>         | <p><input type="checkbox"/> YES</p> <p><input type="checkbox"/> NO</p> <p><b>If YES: Date __/__/____</b></p> <p><b>If yes, was the reason documented a gastrointestinal bleed?</b></p> <p><input type="checkbox"/> YES</p> <p><input type="checkbox"/> NO</p> |
| <p><b>Before answering the following question, please review the gastrointestinal bleeding definition above and responses to questions 22 to 28.</b></p> |                                                                                                                                                                                                                                                                                           |                                                                                                                                                                                                                                                               |
| <b>29</b>                                                                                                                                                | <p><b>Based on the responses to the questions and the identified criteria, does this patient meet the criteria for having had a gastrointestinal bleed during this ICU stay and ≥ 48 hours after ICU admission?</b></p>                                                                   | <p><input type="checkbox"/> YES</p> <p><input type="checkbox"/> NO</p> <p><input type="checkbox"/> Cannot be determined</p> <p><b>If cannot determine, indicate reason:_____</b></p>                                                                          |

Data Abstractors:

Please **do not** answer Question 29.
